# Supplementary material for: Association between Dietary Inflammatory Index and Gastric Adenocarcinoma: A Multicenter Case-Control Study in Brazil
Source: MDPI journal article supplement (doi:10.3390/nu15132867), 2023-06-24
Supplement: s1 [file s1]

Supplementary material

**Table S1.** Sociodemographic, clinical, and nutritional characteristics of cases and controls by Energy-adjusted Dietary Inflammatory Index (E-DII) score quartiles

| Variables                                            |         | E-DII quartiles §           |                              |                              |                             |                           |                             |                              |                               |                             |                           |                             |                             |                             |                             |                           |
|------------------------------------------------------|---------|-----------------------------|------------------------------|------------------------------|-----------------------------|---------------------------|-----------------------------|------------------------------|-------------------------------|-----------------------------|---------------------------|-----------------------------|-----------------------------|-----------------------------|-----------------------------|---------------------------|
|                                                      |         | Cases (n=492)               |                              |                              |                             | P-<br>value <sup>1‡</sup> | Control I (n=377)           |                              |                               |                             | P-<br>value <sup>1‡</sup> | Control II (n=776)          |                             |                             |                             | P-<br>value <sup>1‡</sup> |
|                                                      |         | Q1                          | Q2                           | Q3                           | Q4                          |                           | Q1                          | Q2                           | Q3                            | Q4                          |                           | Q1                          | Q2                          | Q3                          | Q4                          |                           |
|                                                      |         | n=123<br>(−4.35,<br>−1.47)  | n=124<br>(−1.46,<br>−0.45)   | n=122<br>(−0.44,<br>0.52)    | n=123<br>(>0.53)            |                           | n=94<br>(−5.55,<br>−2.01)   | n=94<br>(−2.00,<br>−0.74)    | n=95<br>(−0.73,<br>0.56)      | n=94<br>(>0.56)             |                           | n=194<br>(−5.09,<br>−2.04)  | n=194<br>(−2.03,<br>−0.83)  | n=194<br>(−0.82,<br>0.25)   | n=194<br>(>0.25)            |                           |
| median (P <sub>25</sub> , P <sub>75</sub> ) or n (%) |         |                             |                              |                              |                             |                           |                             |                              |                               |                             |                           |                             |                             |                             |                             |                           |
| Sex                                                  |         |                             |                              |                              |                             | 0.01                      |                             |                              |                               |                             | 0.23                      |                             |                             |                             |                             | <0.001                    |
|                                                      | Female  | 66<br>(53.7)                | 49<br>(39.5)                 | 42<br>(34.4)                 | 42 (34.1)                   |                           | 57<br>(60.6)                | 45 (47.9)                    | 45 (47.4)                     | 48 (51.1)                   |                           | 119<br>(61.3)               | 99<br>(51.0)                | 80<br>(41.2)                | 80 (41.2)                   |                           |
|                                                      | Male    | 57<br>(46.3)                | 75<br>(60.5)                 | 80<br>(65.6)                 | 81 (65.9)                   |                           | 37<br>(39.4)                | 49 (52.1)                    | 50 (52.6)                     | 46 (48.9)                   |                           | 75<br>(38.7)                | 95<br>(49.0)                | 114<br>(58.8)               | 114<br>(58.8)               |                           |
| Age (years)                                          |         | 61 (51,<br>67) <sup>a</sup> | 58 (49,<br>67) <sup>ab</sup> | 57 (48,<br>64) <sup>ab</sup> | 56 (45,<br>62) <sup>c</sup> | <0.001                    | 60 (54,<br>68) <sup>a</sup> | 56 (46,<br>63) <sup>bc</sup> | 54 (43,<br>64) <sup>bcd</sup> | 48 (37,<br>61) <sup>d</sup> | <0.001                    | 56 (45,<br>67) <sup>a</sup> | 59 (51,<br>66) <sup>a</sup> | 53 (42,<br>64) <sup>b</sup> | 49 (38,<br>60) <sup>b</sup> | <0.001                    |
| Self-reported ethnicity                              |         |                             |                              |                              |                             | 0.01 <sup>2</sup>         |                             |                              |                               |                             | 0.39 <sup>2</sup>         |                             |                             |                             |                             | <0.001                    |
|                                                      | White   | 60<br>(48.8)                | 39<br>(31.5)                 | 34<br>(27.9)                 | 48 (39.0)                   |                           | 52<br>(55.3)                | 45 (47.9)                    | 40 (42.1)                     | 43 (45.7)                   |                           | 89<br>(45.9)                | 72<br>(37.1)                | 63<br>(32.6)                | 63 (32.5)                   |                           |
|                                                      | Brown   | 50<br>(40.7)                | 67<br>(54.0)                 | 71<br>(58.2)                 | 61 (49.6)                   |                           | 28<br>(29.8)                | 33 (35.1)                    | 37 (38.9)                     | 36 (33.4)                   |                           | 64<br>(33.0)                | 76<br>(39.2)                | 93<br>(48.2)                | 87 (44.8)                   |                           |
|                                                      | Black   | 5 (4.1)                     | 13<br>(10.5)                 | 13<br>(10.7)                 | 13 (10.6)                   |                           | 8 (8.5)                     | 9 (9.6)                      | 16 (16.8)                     | 10 (10.6)                   |                           | 19 (9.8)                    | 23<br>(11.9)                | 30<br>(15.5)                | 38 (19.6)                   |                           |
|                                                      | Others  | 8 (6.5)                     | 5 (4.0)                      | 4 (3.3)                      | 1 (0.8)                     |                           | 6 (6.4)                     | 7 (7.4)                      | 2 (2.1)                       | 5 (5.3)                     |                           | 22<br>(11.3)                | 23<br>(11.9)                | 7 (3.6)                     | 6 (3.1)                     |                           |
| Schooling (years)                                    |         |                             |                              |                              |                             | 0.56                      |                             |                              |                               |                             | 0.001                     |                             |                             |                             |                             | 0.18                      |
|                                                      | ≤8      | 50<br>(40.7)                | 56<br>(45.2)                 | 65<br>(53.3)                 | 61 (49.6)                   |                           | 24<br>(25.5)                | 29 (30.9)                    | 20 (21.1)                     | 23 (24.5)                   |                           | 46<br>(23.7)                | 54<br>(27.8)                | 38<br>(19.6)                | 34 (17.5)                   |                           |
|                                                      | 9 a 12  | 43<br>(35.0)                | 43<br>(34.7)                 | 36<br>(29.5)                 | 37 (30.1)                   |                           | 28<br>(29.8)                | 36 (38.3)                    | 57 (60.0)                     | 42 (44.7)                   |                           | 95<br>(49.0)                | 95<br>(49.0)                | 108<br>(55.7)               | 114<br>(58.8)               |                           |
|                                                      | ≥13     | 30<br>(24.4)                | 25<br>(20.2)                 | 21<br>(17.2)                 | 25 (20.3)                   |                           | 42<br>(44.7)                | 29 (30.9)                    | 18 (18.9)                     | 29 (30.9)                   |                           | 53<br>(27.3)                | 45<br>(23.2)                | 48<br>(24.7)                | 46 (23.7)                   |                           |
| Marital status                                       |         |                             |                              |                              |                             | 0.91                      |                             |                              |                               |                             | 0.04                      |                             |                             |                             |                             | 0.20                      |
|                                                      | Married | 91<br>(74.0)                | 89<br>(71.8)                 | 88<br>(72.1)                 | 85 (69.1)                   |                           | 64<br>(68.1)                | 64 (68.1)                    | 64 (67.4)                     | 55 (58.5)                   |                           | 136<br>(70.1)               | 134<br>(69.1)               | 130<br>(67.0)               | 123<br>(63.4)               |                           |

|                                                    |                   |               |               |               |               |        |              |           |           |           |                   |               |               |               |               |       |
|----------------------------------------------------|-------------------|---------------|---------------|---------------|---------------|--------|--------------|-----------|-----------|-----------|-------------------|---------------|---------------|---------------|---------------|-------|
|                                                    | Single            | 17<br>(13.8)  | 15<br>(12.1)  | 19<br>(15.6)  | 20 (16.3)     |        | 9 (9.6)      | 20 (21.3) | 13 (13.7) | 24 (25.5) |                   | 35<br>(18.0)  | 27<br>(13.9)  | 38<br>(19.6)  | 47 (24.2)     |       |
|                                                    | Others            | 15<br>(12.2)  | 20<br>(16.1)  | 15<br>(12.3)  | 18 (14.6)     |        | 21<br>(22.3) | 10 (10.6) | 18 (18.9) | 15 (16.0) |                   | 23<br>(11.9)  | 33<br>(17.0)  | 26<br>(13.4)  | 24 (12.4)     |       |
| Family history of cancer in first-degree relatives |                   |               |               |               |               | 0.12   |              |           |           |           | <0.001            |               |               |               |               | 0.06  |
|                                                    | No                | 38<br>(30.9)  | 56<br>(45.2)  | 44<br>(36.4)  | 50 (41.0)     |        | 24<br>(25.8) | 45 (47.9) | 51 (53.7) | 39 (41.5) |                   | 84<br>(43.5)  | 94<br>(48.5)  | 108<br>(56.0) | 105<br>(54.1) |       |
|                                                    | Yes               | 85<br>(69.1)  | 68<br>(54.8)  | 77<br>(63.6)  | 72 (59.0)     |        | 69<br>(74.2) | 49 (52.1) | 44 (46.3) | 55 (58.5) |                   | 109<br>(56.5) | 100<br>(51.5) | 85<br>(44.0)  | 89 (45.9)     |       |
| Tobacco smoking                                    |                   |               |               |               |               | 0.27   |              |           |           |           | 0.29              |               |               |               |               | 0.052 |
|                                                    | No                | 52<br>(42.3)  | 52<br>(42.3)  | 55<br>(45.5)  | 39 (32.0)     |        | 59<br>(64.1) | 53 (56.4) | 54 (56.8) | 61 (64.9) |                   | 126<br>(65.3) | 110<br>(57.0) | 127<br>(66.1) | 132<br>(68.0) |       |
|                                                    | Low               | 24<br>(19.5)  | 19<br>(15.4)  | 18<br>(14.9)  | 19 (15.6)     |        | 16<br>(17.4) | 22 (23.4) | 13 (13.7) | 16 (17.0) |                   | 33<br>(17.1)  | 26<br>(13.5)  | 27<br>(14.1)  | 30 (10.3)     |       |
|                                                    | Intermediate/High | 47<br>(38.2)  | 52<br>(42.3)  | 48<br>(39.7)  | 64 (52.5)     |        | 17<br>(18.5) | 19 (20.2) | 28 (29.5) | 17 (18.1) |                   | 34<br>(17.6)  | 57<br>(29.5)  | 38<br>(19.8)  | 42 (21.6)     |       |
| Alcohol consumption                                |                   |               |               |               |               | 0.056  |              |           |           |           | <0.001            |               |               |               |               | 0.008 |
|                                                    | No                | 71<br>(57.1)  | 59<br>(47.6)  | 54<br>(46.2)  | 46 (37.4)     |        | 58<br>(64.4) | 37 (39.8) | 37 (39.4) | 48 (51.1) |                   | 145<br>(75.9) | 134<br>(69.8) | 117<br>(61.6) | 112<br>(59.3) |       |
|                                                    | Low               | 16<br>(13.0)  | 21<br>(16.9)  | 14<br>(12.0)  | 24 (19.5)     |        | 16<br>(17.8) | 20 (21.5) | 11 (11.7) | 8 (8.5)   |                   | 13 (6.8)      | 15 (7.8)      | 21<br>(11.1)  | 15 (7.9)      |       |
|                                                    | Intermediate/High | 36<br>(29.3)  | 44<br>(35.5)  | 49<br>(41.9)  | 53 (43.1)     |        | 16<br>(17.8) | 36 (38.7) | 46 (48.9) | 38 (40.4) |                   | 33<br>(17.3)  | 43<br>(22.4)  | 52<br>(27.4)  | 62 (32.8)     |       |
| Diabetes                                           |                   |               |               |               |               | <0.001 |              |           |           |           | 0.38              |               |               |               |               | 0.11  |
|                                                    | No                | 97<br>(78.9)  | 117<br>(94.4) | 115<br>(94.3) | 118<br>(95.9) |        | 81<br>(86.2) | 83 (88.3) | 78 (82.1) | 85 (90.4) |                   | 176<br>(90.7) | 176<br>(90.7) | 183<br>(94.3) | 186<br>(95.9) |       |
|                                                    | Yes               | 26<br>(21.1)  | 7 (5.6)       | 7 (5.7)       | 5 (4.1)       |        | 13<br>(13.8) | 11 (11.7) | 17 (17.9) | 9 (9.6)   |                   | 18 (9.3)      | 18 (9.3)      | 11 (5.7)      | 8 (4.1)       |       |
| Peptic ulcer                                       |                   |               |               |               |               | 0.81   |              |           |           |           | 0.16 <sup>2</sup> |               |               |               |               | -     |
|                                                    | No                | 115<br>(93.5) | 113<br>(91.1) | 110<br>(90.2) | 113<br>(91.9) |        | 91<br>(96.8) | 85 (90.4) | 92 (96.8) | 91 (96.8) |                   | -             | -             | -             | -             |       |
|                                                    | Yes               | 8 (6.5)       | 11<br>(8.9)   | 12<br>(9.8)   | 10 (8.1)      |        | 3 (3.2)      | 9 (9.6)   | 3 (3.2)   | 3 (3.2)   |                   | -             | -             | -             | -             |       |
| H. pylori status                                   |                   |               |               |               |               | 0.33   |              |           |           |           | 0.96              |               |               |               |               | -     |
|                                                    | Negative          | 69<br>(84.1)  | 49<br>(72.1)  | 52<br>(75.4)  | 60 (76.9)     |        | 63<br>(71.6) | 58 (69.9) | 53 (67.9) | 53 (70.7) |                   | -             | -             | -             | -             |       |
|                                                    | Positive          | 13<br>(15.9)  | 19<br>(27.9)  | 17<br>(24.6)  | 18 (23.1)     |        | 25<br>(28.4) | 25 (30.1) | 25 (32.1) | 22 (29.3) |                   | -             | -             | -             | -             |       |
| PPIs/H2RAs                                         |                   |               |               |               |               | 0.22   |              |           |           |           | 0.44              |               |               |               |               | 0.049 |

|                                 |     |               |               |               |               |       |              |           |           |           |        |               |               |               |               |                   |
|---------------------------------|-----|---------------|---------------|---------------|---------------|-------|--------------|-----------|-----------|-----------|--------|---------------|---------------|---------------|---------------|-------------------|
| <i>Antacids</i>                 | No  | 57<br>(47.1)  | 66<br>(53.2)  | 68<br>(56.2)  | 74 (60.2)     | 0.057 | 51<br>(54.8) | 54 (57.4) | 50 (52.6) | 60 (63.8) | 0.11   | 175<br>(90.7) | 159<br>(82.4) | 174<br>(89.7) | 173<br>(89.2) | 0.04 <sup>2</sup> |
|                                 | Yes | 64<br>(52.9)  | 58<br>(46.8)  | 53<br>(43.8)  | 49 (39.8)     |       | 42<br>(45.2) | 40 (42.6) | 45 (47.4) | 34 (36.2) |        | 18 (9.3)      | 34<br>(17.6)  | 20<br>(10.3)  | 21 (10.8)     |                   |
|                                 | No  | 101<br>(82.1) | 99<br>(79.8)  | 110<br>(90.9) | 108<br>(87.8) |       | 86<br>(92.5) | 77 (81.9) | 81 (85.3) | 85 (90.4) |        | 191<br>(99.0) | 192<br>(99.0) | 184<br>(94.8) | 188<br>(96.9) |                   |
|                                 | Yes | 22<br>(17.9)  | 25<br>(20.2)  | 11<br>(9.1)   | 15 (12.2)     |       | 7 (7.5)      | 17 (18.1) | 14 (14.7) | 9 (9.6)   |        | 2 (1.0)       | 2 (1.0)       | 10 (5.2)      | 6 (3.1)       |                   |
| <i>Aspirin</i>                  | No  | 109<br>(88.6) | 117<br>(94.4) | 118<br>(97.5) | 118<br>(95.9) | 0.02  | 83<br>(89.2) | 87 (92.6) | 89 (93.7) | 92 (97.9) | 0.13   | 177<br>(91.7) | 183<br>(94.3) | 188<br>(96.9) | 191<br>(98.5) | 0.009             |
|                                 | Yes | 14<br>(11.4)  | 7 (5.6)       | 3 (2.5)       | 5 (4.1)       |       | 10<br>(10.8) | 7 (7.4)   | 6 (6.3)   | 2 (2.1)   |        | 16 (8.3)      | 11 (5.7)      | 6 (3.1)       | 3 (1.5)       |                   |
|                                 | No  | 106<br>(86.2) | 110<br>(88.7) | 107<br>(88.4) | 112<br>(91.1) |       | 79<br>(84.9) | 85 (90.4) | 82 (21.8) | 85 (90.4) |        | 181<br>(93.8) | 188<br>(96.9) | 183<br>(94.3) | 184<br>(94.8) |                   |
|                                 | Yes | 17<br>(13.8)  | 14<br>(11.3)  | 14<br>(11.6)  | 11 (8.9)      |       | 14<br>(15.1) | 9 (9.6)   | 13 (13.7) | 9 (9.6)   |        | 12 (6.2)      | 6 (3.1)       | 11 (5.7)      | 10 (5.2)      |                   |
| <i>Other NSAIDs</i>             | No  | 106<br>(86.2) | 110<br>(88.7) | 107<br>(88.4) | 112<br>(91.1) | 0.69  | 79<br>(84.9) | 85 (90.4) | 82 (21.8) | 85 (90.4) | 0.55   | 181<br>(93.8) | 188<br>(96.9) | 183<br>(94.3) | 184<br>(94.8) | 0.52              |
|                                 | Yes | 17<br>(13.8)  | 14<br>(11.3)  | 14<br>(11.6)  | 11 (8.9)      |       | 14<br>(15.1) | 9 (9.6)   | 13 (13.7) | 9 (9.6)   |        | 12 (6.2)      | 6 (3.1)       | 11 (5.7)      | 10 (5.2)      |                   |
|                                 | No  | 106<br>(86.2) | 110<br>(88.7) | 107<br>(88.4) | 112<br>(91.1) |       | 79<br>(84.9) | 85 (90.4) | 82 (21.8) | 85 (90.4) |        | 181<br>(93.8) | 188<br>(96.9) | 183<br>(94.3) | 184<br>(94.8) |                   |
|                                 | Yes | 17<br>(13.8)  | 14<br>(11.3)  | 14<br>(11.6)  | 11 (8.9)      |       | 14<br>(15.1) | 9 (9.6)   | 13 (13.7) | 9 (9.6)   |        | 12 (6.2)      | 6 (3.1)       | 11 (5.7)      | 10 (5.2)      |                   |
| <i>BMI (categories)</i>         | No  | 106<br>(86.2) | 110<br>(88.7) | 107<br>(88.4) | 112<br>(91.1) | 0.59  | 79<br>(84.9) | 85 (90.4) | 82 (21.8) | 85 (90.4) | 0.07   | 181<br>(93.8) | 188<br>(96.9) | 183<br>(94.3) | 184<br>(94.8) | 0.33              |
|                                 | Yes | 17<br>(13.8)  | 14<br>(11.3)  | 14<br>(11.6)  | 11 (8.9)      |       | 14<br>(15.1) | 9 (9.6)   | 13 (13.7) | 9 (9.6)   |        | 12 (6.2)      | 6 (3.1)       | 11 (5.7)      | 10 (5.2)      |                   |
|                                 | No  | 106<br>(86.2) | 110<br>(88.7) | 107<br>(88.4) | 112<br>(91.1) |       | 79<br>(84.9) | 85 (90.4) | 82 (21.8) | 85 (90.4) |        | 181<br>(93.8) | 188<br>(96.9) | 183<br>(94.3) | 184<br>(94.8) |                   |
|                                 | Yes | 17<br>(13.8)  | 14<br>(11.3)  | 14<br>(11.6)  | 11 (8.9)      |       | 14<br>(15.1) | 9 (9.6)   | 13 (13.7) | 9 (9.6)   |        | 12 (6.2)      | 6 (3.1)       | 11 (5.7)      | 10 (5.2)      |                   |
| <i>Normal Weight</i>            | No  | 106<br>(86.2) | 110<br>(88.7) | 107<br>(88.4) | 112<br>(91.1) | 0.11  | 79<br>(84.9) | 85 (90.4) | 82 (21.8) | 85 (90.4) | <0.001 | 181<br>(93.8) | 188<br>(96.9) | 183<br>(94.3) | 184<br>(94.8) | 0.60              |
|                                 | Yes | 17<br>(13.8)  | 14<br>(11.3)  | 14<br>(11.6)  | 11 (8.9)      |       | 14<br>(15.1) | 9 (9.6)   | 13 (13.7) | 9 (9.6)   |        | 12 (6.2)      | 6 (3.1)       | 11 (5.7)      | 10 (5.2)      |                   |
|                                 | No  | 106<br>(86.2) | 110<br>(88.7) | 107<br>(88.4) | 112<br>(91.1) |       | 79<br>(84.9) | 85 (90.4) | 82 (21.8) | 85 (90.4) |        | 181<br>(93.8) | 188<br>(96.9) | 183<br>(94.3) | 184<br>(94.8) |                   |
|                                 | Yes | 17<br>(13.8)  | 14<br>(11.3)  | 14<br>(11.6)  | 11 (8.9)      |       | 14<br>(15.1) | 9 (9.6)   | 13 (13.7) | 9 (9.6)   |        | 12 (6.2)      | 6 (3.1)       | 11 (5.7)      | 10 (5.2)      |                   |
| <i>Underweight/Malnutrition</i> | No  | 106<br>(86.2) | 110<br>(88.7) | 107<br>(88.4) | 112<br>(91.1) | 0.01  | 79<br>(84.9) | 85 (90.4) | 82 (21.8) | 85 (90.4) | <0.001 | 181<br>(93.8) | 188<br>(96.9) | 183<br>(94.3) | 184<br>(94.8) | <0.001            |
|                                 | Yes | 17<br>(13.8)  | 14<br>(11.3)  | 14<br>(11.6)  | 11 (8.9)      |       | 14<br>(15.1) | 9 (9.6)   | 13 (13.7) | 9 (9.6)   |        | 12 (6.2)      | 6 (3.1)       | 11 (5.7)      | 10 (5.2)      |                   |
|                                 | No  | 106<br>(86.2) | 110<br>(88.7) | 107<br>(88.4) | 112<br>(91.1) |       | 79<br>(84.9) | 85 (90.4) | 82 (21.8) | 85 (90.4) |        | 181<br>(93.8) | 188<br>(96.9) | 183<br>(94.3) | 184<br>(94.8) |                   |
|                                 | Yes | 17<br>(13.8)  | 14<br>(11.3)  | 14<br>(11.6)  | 11 (8.9)      |       | 14<br>(15.1) | 9 (9.6)   | 13 (13.7) | 9 (9.6)   |        | 12 (6.2)      | 6 (3.1)       | 11 (5.7)      | 10 (5.2)      |                   |
| <i>Overweight</i>               | No  | 106<br>(86.2) | 110<br>(88.7) | 107<br>(88.4) | 112<br>(91.1) | 0.18  | 79<br>(84.9) | 85 (90.4) | 82 (21.8) | 85 (90.4) | <0.001 | 181<br>(93.8) | 188<br>(96.9) | 183<br>(94.3) | 184<br>(94.8) | <0.001            |
|                                 | Yes | 17<br>(13.8)  | 14<br>(11.3)  | 14<br>(11.6)  | 11 (8.9)      |       | 14<br>(15.1) | 9 (9.6)   | 13 (13.7) | 9 (9.6)   |        | 12 (6.2)      | 6 (3.1)       | 11 (5.7)      | 10 (5.2)      |                   |
|                                 | No  | 106<br>(86.2) | 110<br>(88.7) | 107<br>(88.4) | 112<br>(91.1) |       | 79<br>(84.9) | 85 (90.4) | 82 (21.8) | 85 (90.4) |        | 181<br>(93.8) | 188<br>(96.9) | 183<br>(94.3) | 184<br>(94.8) |                   |
|                                 | Yes | 17<br>(13.8)  | 14<br>(11.3)  | 14<br>(11.6)  | 11 (8.9)      |       | 14<br>(15.1) | 9 (9.6)   | 13 (13.7) | 9 (9.6)   |        | 12 (6.2)      | 6 (3.1)       | 11 (5.7)      | 10 (5.2)      |                   |
| <i>Obese</i>                    | No  | 106<br>(86.2) | 110<br>(88.7) | 107<br>(88.4) | 112<br>(91.1) | 0.18  | 79<br>(84.9) | 85 (90.4) | 82 (21.8) | 85 (90.4) | <0.001 | 181<br>(93.8) | 188<br>(96.9) | 183<br>(94.3) | 184<br>(94.8) | <0.001            |
|                                 | Yes | 17<br>(13.8)  | 14<br>(11.3)  | 14<br>(11.6)  | 11 (8.9)      |       | 14<br>(15.1) | 9 (9.6)   | 13 (13.7) | 9 (9.6)   |        | 12 (6.2)      | 6 (3.1)       | 11 (5.7)      | 10 (5.2)      |                   |
|                                 | No  | 106<br>(86.2) | 110<br>(88.7) | 107<br>(88.4) | 112<br>(91.1) |       | 79<br>(84.9) | 85 (90.4) | 82 (21.8) | 85 (90.4) |        | 181<br>(93.8) | 188<br>(96.9) | 183<br>(94.3) | 184<br>(94.8) |                   |
|                                 | Yes | 17<br>(13.8)  | 14<br>(11.3)  | 14<br>(11.6)  | 11 (8.9)      |       | 14<br>(15.1) | 9 (9.6)   | 13 (13.7) | 9 (9.6)   |        | 12 (6.2)      | 6 (3.1)       | 11 (5.7)      | 10 (5.2)      |                   |
| <i>Energy intake (kcal/day)</i> | No  | 106<br>(86.2) | 110<br>(88.7) | 107<br>(88.4) | 112<br>(91.1) | 0.11  | 79<br>(84.9) | 85 (90.4) | 82 (21.8) | 85 (90.4) | <0.001 | 181<br>(93.8) | 188<br>(96.9) | 183<br>(94.3) | 184<br>(94.8) | 0.60              |
|                                 | Yes | 17<br>(13.8)  | 14<br>(11.3)  | 14<br>(11.6)  | 11 (8.9)      |       | 14<br>(15.1) | 9 (9.6)   | 13 (13.7) | 9 (9.6)   |        | 12 (6.2)      | 6 (3.1)       | 11 (5.7)      | 10 (5.2)      |                   |
|                                 | No  | 106<br>(86.2) | 110<br>(88.7) | 107<br>(88.4) | 112<br>(91.1) |       | 79<br>(84.9) | 85 (90.4) | 82 (21.8) | 85 (90.4) |        | 181<br>(93.8) | 188<br>(96.9) | 183<br>(94.3) | 184<br>(94.8) |                   |
|                                 | Yes | 17<br>(13.8)  | 14<br>(11.3)  | 14<br>(11.6)  | 11 (8.9)      |       | 14<br>(15.1) | 9 (9.6)   | 13 (13.7) | 9 (9.6)   |        | 12 (6.2)      | 6 (3.1)       | 11 (5.7)      | 10 (5.2)      |                   |
| <i>Sodium intake (g/day)</i>    | No  | 106<br>(86.2) | 110<br>(88.7) | 107<br>(88.4) | 112<br>(91.1) | 0.01  | 79<br>(84.9) | 85 (90.4) | 82 (21.8) | 85 (90.4) | <0.001 | 181<br>(93.8) | 188<br>(96.9) | 183<br>(94.3) | 184<br>(94.8) | <0.001            |
|                                 | Yes | 17<br>(13.8)  | 14<br>(11.3)  | 14<br>(11.6)  | 11 (8.9)      |       | 14<br>(15.1) | 9 (9.6)   | 13 (13.7) | 9 (9.6)   |        | 12 (6.2)      | 6 (3.1)       | 11 (5.7)      | 10 (5.2)      |                   |
|                                 | No  | 106<br>(86.2) | 110<br>(88.7) | 107<br>(88.4) | 112<br>(91.1) |       | 79<br>(84.9) | 85 (90.4) | 82 (21.8) | 85 (90.4) |        | 181<br>(93.8) | 188<br>(96.9) | 183<br>(94.3) | 184<br>(94.8) |                   |
|                                 | Yes | 17<br>(13.8)  | 14<br>(11.3)  | 14<br>(11.6)  | 11 (8.9)      |       | 14<br>(15.1) | 9 (9.6)   | 13 (13.7) | 9 (9.6)   |        | 12 (6.2)      | 6 (3.1)       | 11 (5.7)      | 10 (5.2)      |                   |
| <i>Nutritional supplement</i>   | No  | 106<br>(86.2) | 110<br>(88.7) | 107<br>(88.4) | 112<br>(91.1) | 0.18  | 79<br>(84.9) | 85 (90.4) | 82 (21.8) | 85 (90.4) | <0.001 | 181<br>(93.8) | 188<br>(96.9) | 183<br>(94.3) | 184<br>(94.8) | <0.001            |
|                                 | Yes | 17<br>(13.8)  | 14<br>(11.3)  | 14<br>(11.6)  | 11 (8.9)      |       | 14<br>(15.1) | 9 (9.6)   | 13 (13.7) | 9 (9.6)   |        | 12 (6.2)      | 6 (3.1)       | 11 (5.7)      | 10 (5.2)      |                   |
|                                 | No  | 106<br>(86.2) | 110<br>(88.7) | 107<br>(88.4) | 112<br>(91.1) |       | 79<br>(84.9) | 85 (90.4) | 82 (21.8) | 85 (90.4) |        | 181<br>(93.8) | 188<br>(96.9) | 183<br>(94.3) | 184<br>(94.8) |                   |
|                                 | Yes | 17<br>(13.8)  | 14<br>(11.3)  | 14<br>(11.6)  | 11 (8.9)      |       | 14<br>(15.1) | 9 (9.6)   | 13 (13.7) | 9 (9.6)   |        | 12 (6.2)      | 6 (3.1)       | 11 (5.7)      | 10 (5.2)      |                   |

Numbers may differ because of missing values. Control I individuals (endoscopy); Control II individuals (hospital). PPIs/H2RAs: proton pump inhibitors/H2-receptor antagonists; NSAIDs: non-steroidal anti-inflammatory drugs; BMI: body mass index. § Based on cases, control I and control II scores. <sup>1</sup> Pearson  $\chi^2$  test or <sup>2</sup> Fisher's Exact tests for categorical variables. <sup>1</sup> Kruskal-Wallis test and Dunn-Bonferroni post hoc test for continuous variables. Different letters on the same line mean statistical difference between quartiles. ‡ *P*-value demonstrates difference between Quartile 4 (maximum pro-inflammatory diet) versus Quartile 1 (maximum anti-inflammatory diet) of the E-DII. Significance *p*-value < 0.05.
